# Supplementary material for: NK cell-induced damage to P.falciparum-infected erythrocytes requires ligand-specific recognition and releases parasitophorous vacuoles that are phagocytosed by monocytes in the presence of immune IgG
Source: PubMed Central journal article supplement (PMC10659167; doi:10.1371/journal.ppat.1011585), 2023-11-08

A

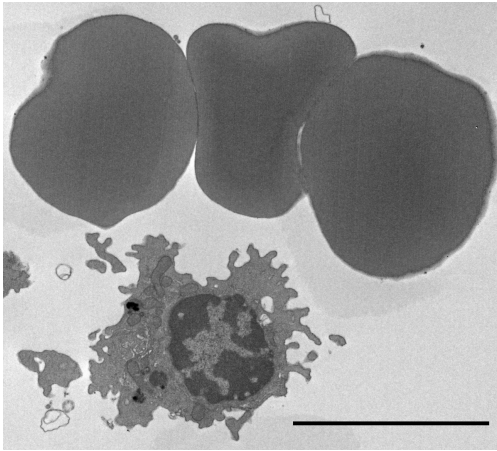

B

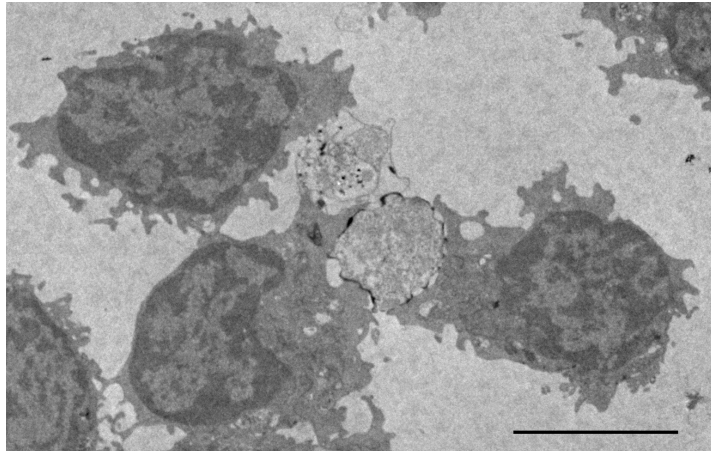

C

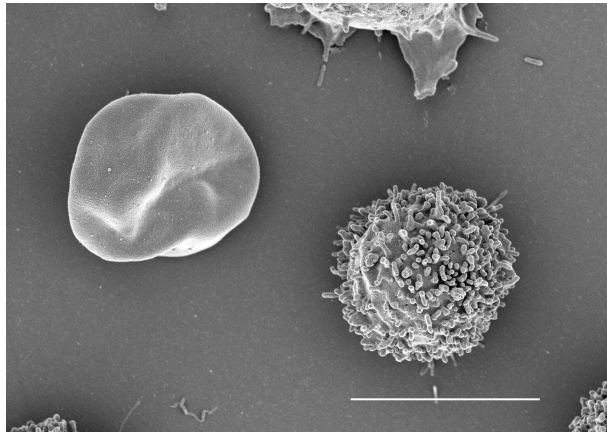

D

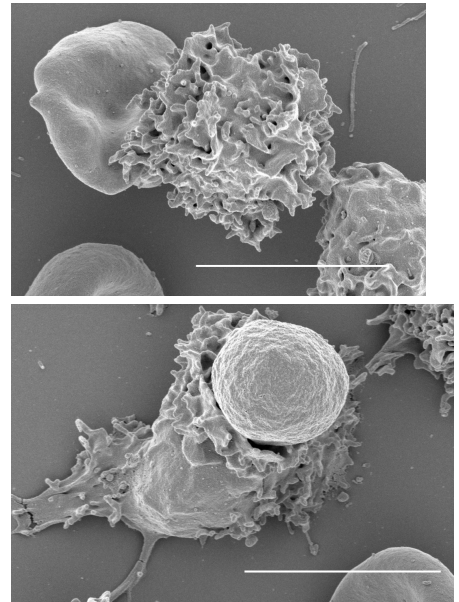

E

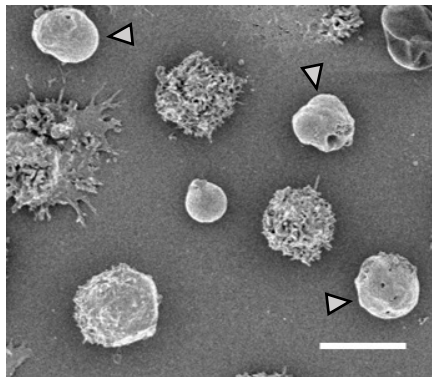

Supplement: ppat.1011585.s004.pdf [file ppat.1011585.s004.pdf]
